# Supplementary material for: Structure of Mycobacterium tuberculosis Cya, an evolutionary ancestor of the mammalian membrane adenylyl cyclases
Source: eLife. 2022 Aug 18;11:e77032. doi: 10.7554/eLife.77032 (PMC9433096; doi:10.7554/eLife.77032)
Supplement: Figure 1—source data 1. [file elife-77032-fig1-data1.xlsx]

## Sheet: Figure1
Title:	Structure of Mycobacterium tuberculosis Cya, an evolutionary ancestor of the mammalian membrane adenylyl cyclases
Authors:	Ved Mehta, Basavraj Khanppnavar, Dina Schuster, Ilayda Kantarci, Irene Vercellino, Angela Kosturanova, Tarun Iype, Sasa Stefanic, Paola Picotti and Volodymyr M. Korkhov
Figure 1D
	[ATP], mM	Rv1625c			Rv1625c + NB4						SOL			SOL + NB4
	1	11.7518	10.6669	11.1853	7.46285	10.9153	8.94962	0.0164203	0.0226471	0.0247638
	3.3	37.8348	35.3136	37.5884	37.8418	35.3293	31.0093	0.0713702	0.0566819	0.0897613	0.034804	0.02945	0.007261	0.031981	0.048155	0.028431
	10	116.335	105.757	106.63	111.68	104.361	93.0446	0.204392	0.171011	0.226595	0.206627	0.097158	0.08136	0.233337	0.122622	0.113771
	33	335.307	311.705	335.904	347.081	332.819	253.707	0.749817	0.655827	0.712389	0.559653	0.653879	0.312811	0.592781	1.0674	0.342478
	100	724.274	635.537	662.947	690.144	712.521	549.173	3.3362	2.651	3.51136	2.60765	2.82105	1.33899	2.28089	4.2306	1.21474
	330	963.588	999.718	1048.67	1157.01	893.811	806.918	18.3288	16.6628	18.6542	11.001	9.56746	4.86761	12.7417	18.0625	6.32004
	1000	1133.05	994.92	1028.85	1025.12	985.751	714.164	95.2347	94.4101	103.125	73.5911	63.0932	17.8825	70.3024	69.24	27.8744
												Analysis:
													Rv1625c	Rv1625c + NB4	SOL	SOL + NB4
												Michaelis-Menten			Ambiguous	Ambiguous
												Best-fit values
												Vmax	1177	1043	~ 5.194e+016	~ 1.155e+016
												Km	77.56	65.9	~ 7.345e+017	~ 2.149e+017
												95% CI (profile likelihood)
												Vmax	1122 to 1235	927.9 to 1170	(Very wide)	(Very wide)
												Km	65.36 to 91.97	43.03 to 100.1	(Very wide)	(Very wide)
												Goodness of Fit
												Degrees of Freedom	19	19	37	16
												R squared	0.9903	0.9398	0.8124	0.8387
												Sum of Squares	35528	190141	5982	1372
												Sy.x	43.24	100	12.72	9.259
												Constraints
												Km	Km > 0	Km > 0	Km > 0	Km > 0
												Number of points
												# of X values	42	42	42	42
												# Y values analyzed	21	21	39	18
