# Supplementary material for: Structure of Mycobacterium tuberculosis Cya, an evolutionary ancestor of the mammalian membrane adenylyl cyclases
Source: eLife. 2022 Aug 18;11:e77032. doi: 10.7554/eLife.77032 (PMC9433096; doi:10.7554/eLife.77032)
Supplement: Figure 5—source data 1. [file elife-77032-fig5-data1.xlsx]

## Sheet: Figure5
Figure 5D
		Cya	Cya + ATPαS	Ex1-5A	Ex1-5A + ATPαS
	Tm, ℃	43.66	55.33	49.19	54.35
		44.97	54.98	48.77	52.36
		45	54.63	47.74	52.57
Figure 5E
		[ATP], mM		Ex1-5A
		1.3	0.982841	0.320077	0.885681
		4.1	3.04241	3.00945	2.91803
		12	12.3023	9.08381	8.46395
		33	33.6775	28.6104	23.1498
		111	56.8663	66.6515	69.6702
		330	263.336	275.127	275.844						Analysis:
		1000	662.742	625.418	733.961
											Michaelis-Menten
											Best-fit values
											Vmax	3322
											Km	3918
											95% CI (profile likelihood)
											Vmax	2096 to 10174
											Km	2158 to 13862
											Goodness of Fit
											Degrees of Freedom	19
											R squared	0.992
											Sum of Squares	9088
											Sy.x	21.87
											Constraints
											Km	Km > 0
											Number of points
											# of X values	21
											# Y values analyzed	21
Figure 5F
		[MANT-GTP], mM	Cya			Ex1-5A
		0.001	100	100	100	100	100	100
		0.0033	96.2197	97.2823	96.76	104.015	109.444	96.1507
		0.01	96.3426	93.9293	89.906	111.3	102.766	93.6374
		0.033	84.7346	81.1868	79.6994	105.173	81.8053	98.7584
		0.1	39.4335	54.1954	53.0042	82.4421	93.1666	86.9663
		0.33	16.6446	18.8992	23.897	48.3123	63.4575	42.0584
		1	1.49195	8.71554	5.20353	17.5244	14.3868	22.3603			Analysis:
		3.3	-0.747867	0.833713	-1.38896	-2.89171	9.44845	1.06099
												Cya	Ex1-5A
											[Inhibitor] vs. response (three parameters)
											Best-fit values
											Bottom	-5.351	-13.2
											Top	101.7	104.1
											IC50	1.108e-07	4.24e-07
											logIC50	-6.956	-6.373
											Span	107.1	117.3
											95% CI (profile likelihood)
											Bottom	-9.511 to -1.329	-26.57 to -1.643
											Top	98.67 to 104.9	99.35 to 109.0
											IC50	9.187e-008 to 1.337e-007	2.931e-007 to 6.180e-007
											logIC50	-7.037 to -6.874	-6.533 to -6.209
											Goodness of Fit
											Degrees of Freedom	21	21
											R squared	0.9913	0.9675
											Sum of Squares	334	1162
											Sy.x	3.988	7.438
											Constraints
											IC50	IC50 > 0	IC50 > 0
											Number of points
											# of X values	24	24
											# Y values analyzed	24	24
